# Supplementary material for: Face-controlled chirality induction in octahedral thiacalixarene-based porous coordination cages
Source: Royal Society of Chemistry journal article supplement (doi:10.1039/d4nr03622k), 2024-12-09
Supplement: d4nr03622k1.pdf [file d4nr03622k1.pdf]

SI

# Face-controlled chirality induction in octahedral thiacalixarene-based porous coordination cages

Ivan V. Khariushin,<sup>a</sup> Alexander S. Ovsyannikov,<sup>b</sup> Stéphane A. Baudron,<sup>a</sup> Jas S. Ward,<sup>c</sup> Anniina Kiesilä,<sup>c</sup> Kari Rissanen,<sup>c</sup> Elina Kalenius,<sup>c</sup> Matthieu Chessé,<sup>d</sup> Beata Nowicka,<sup>e</sup> Svetlana E. Solovieva,<sup>f</sup> Igor S. Antipin,<sup>f</sup> Véronique Bulach<sup>a</sup> and Sylvie Ferlay<sup>\*a</sup>

<sup>a</sup> Université de Strasbourg, CNRS, CMC UMR 7140, F-67000 Strasbourg, FRANCE. E-mail: ferlay@unistra.fr

<sup>b</sup> Arbuzov Institute of Organic and Physical Chemistry, FRC Kazan Scientific Center, Russian Academy of Sciences, Arbuzova 8, Kazan, RUSSIAN FEDERATION

<sup>c</sup> University of Jyväskylä, Department of Chemistry, 40014 Jyväskylä, FINLAND

<sup>d</sup> LIMA UMR 7042, Université de Strasbourg et CNRS et UHA, European School of Chemistry, Polymers and Materials (ECPM), 25 Rue Becquerel, F-67087 Strasbourg, FRANCE

<sup>e</sup> Faculty of Chemistry, Jagiellonian University, Gronostajowa 2, 30-387 Kraków, POLAND

<sup>f</sup> Kazan Federal University, Kremlevskaya 18, Kazan 420008, RUSSIAN FEDERATION

## Chiral HPLC for $\Lambda$ -Co(HL)<sub>3</sub> and $\Delta$ -Co(HL)<sub>3</sub>

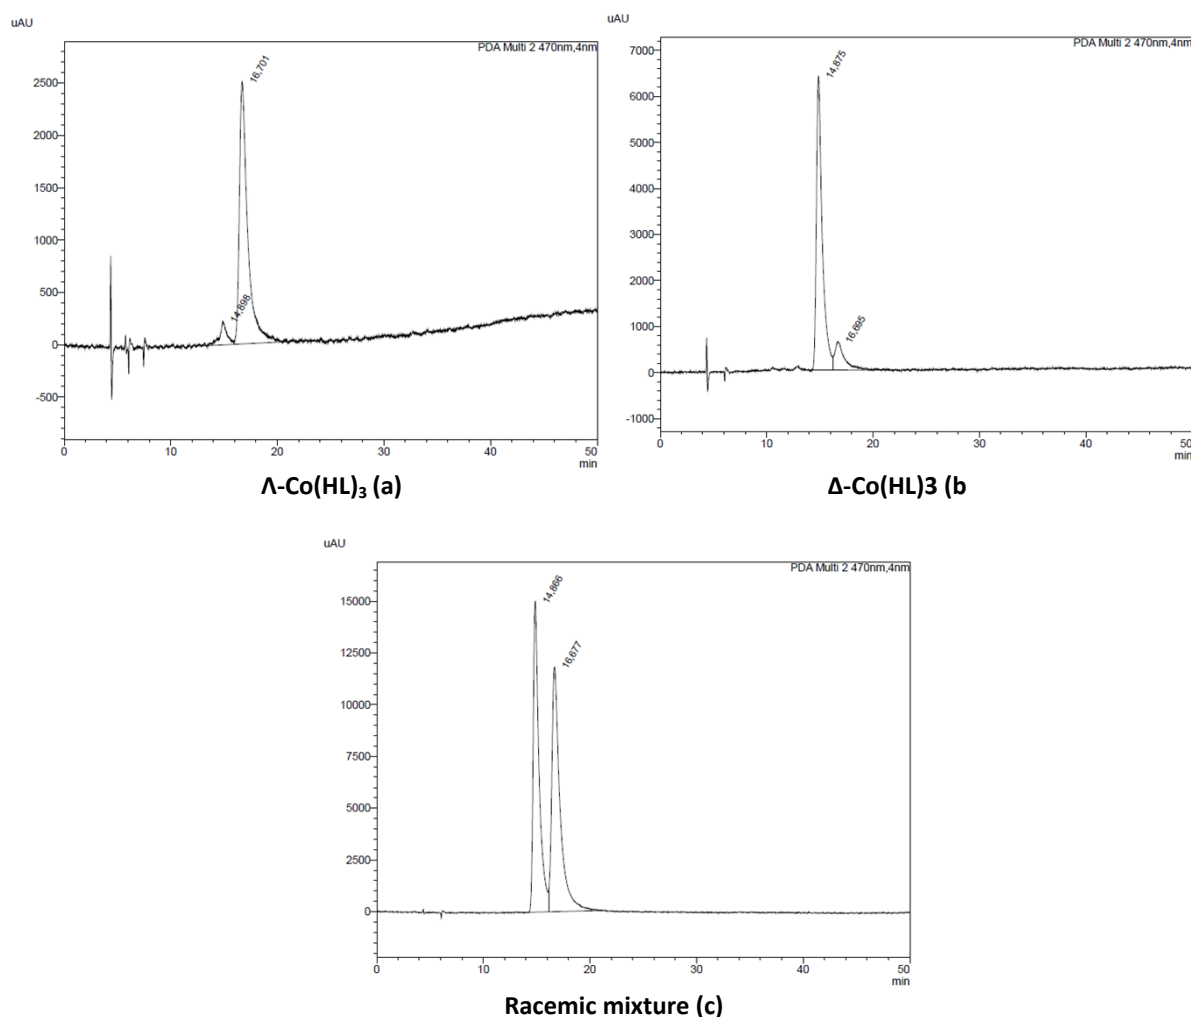

**Figure S1:** HPLC chromatograms of a)  $\Lambda$ -Co(HL)<sub>3</sub> b)  $\Delta$ -Co(HL)<sub>3</sub> and c) racemic mixture *rac*-Co(HL)<sub>3</sub> for comparison

## The asymmetric unit for the reported compounds

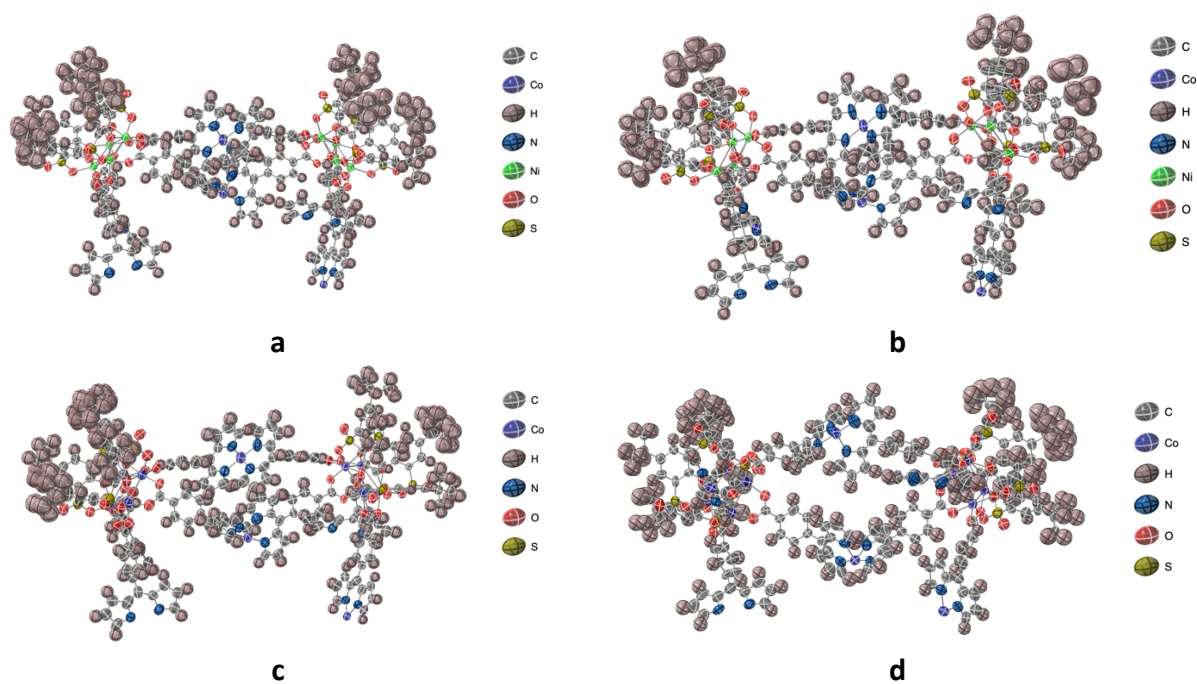

**Figure S2:** The asymmetric unit for a)  $[\text{Ni}_4\text{SO}_2\text{TCA}(\mu_4\text{-OH}_2)]_6[\Delta\text{-Co(L)}_3]_8 \cdot n\text{DMF} \cdot m\text{H}_2\text{O}$  b)  $[\text{Ni}_4\text{SO}_2\text{TCA}(\mu_4\text{-OH}_2)]_6[\Lambda\text{-Co(L)}_3]_8 \cdot n\text{DMF} \cdot m\text{H}_2\text{O}$  c)  $\text{Co}_4\text{SO}_2\text{TCA}(\mu_4\text{-OH}_2)]_6[\Delta\text{-Co(L)}_3]_8 \cdot n\text{DMF} \cdot m\text{H}_2\text{O}$  and d)  $[\text{Co}_4\text{SO}_2\text{TCA}(\mu_4\text{-OH}_2)]_6[\Lambda\text{-Co(L)}_3]_8 \cdot n\text{DMF} \cdot m\text{H}_2\text{O}$  cages. Thermal ellipsoids are at 50% probability.

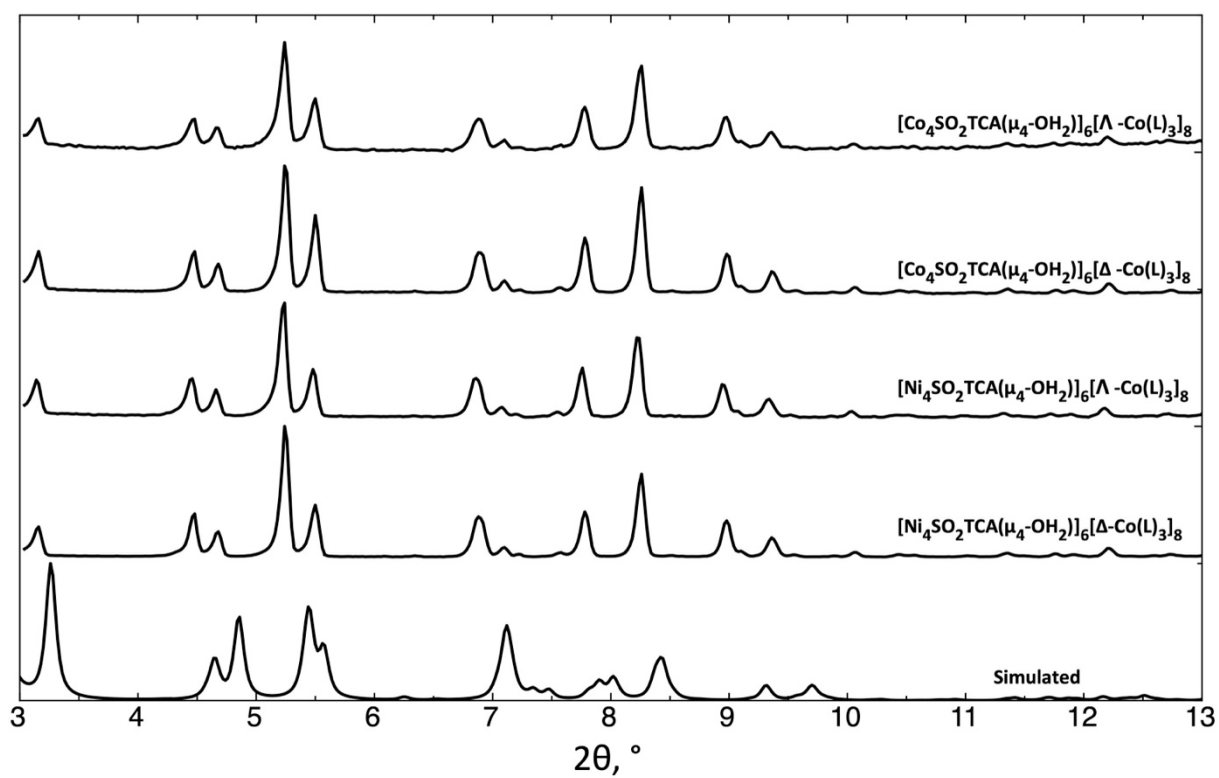

**Figure S3.** The powder X-Ray diffraction (PXRD) patterns for freshly prepared compounds in their mother liquor,  $[M_4SO_2TCA(\mu_4-OH_2)]_6[\Delta/\Lambda-Co(L)_3]_8$  ( $M = Ni$  or  $Co$ ) compared to the simulated diagram for  $[Ni_4SO_2TCA(\mu_4-OH_2)]_6[\Lambda-Co(L)_3]_8$

## ESI-MS spectra

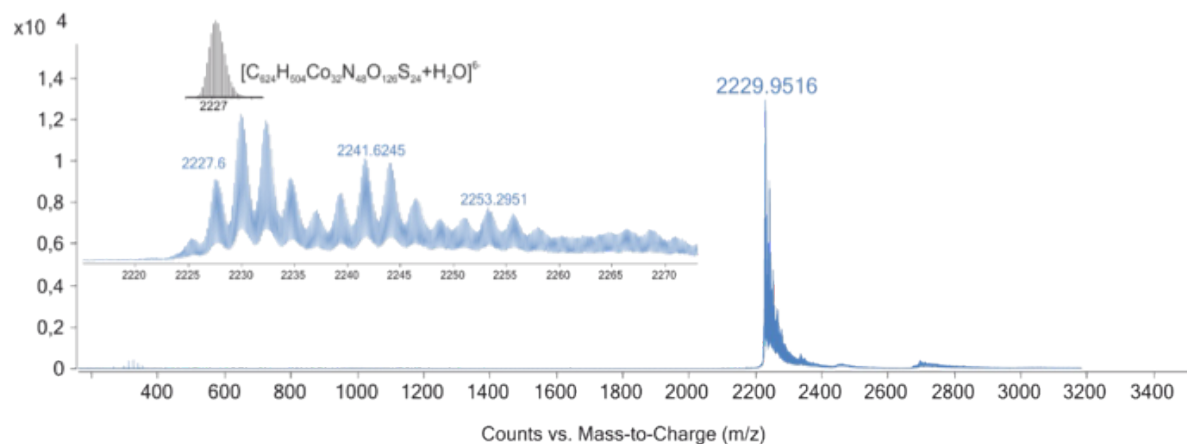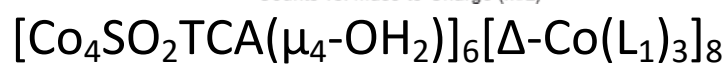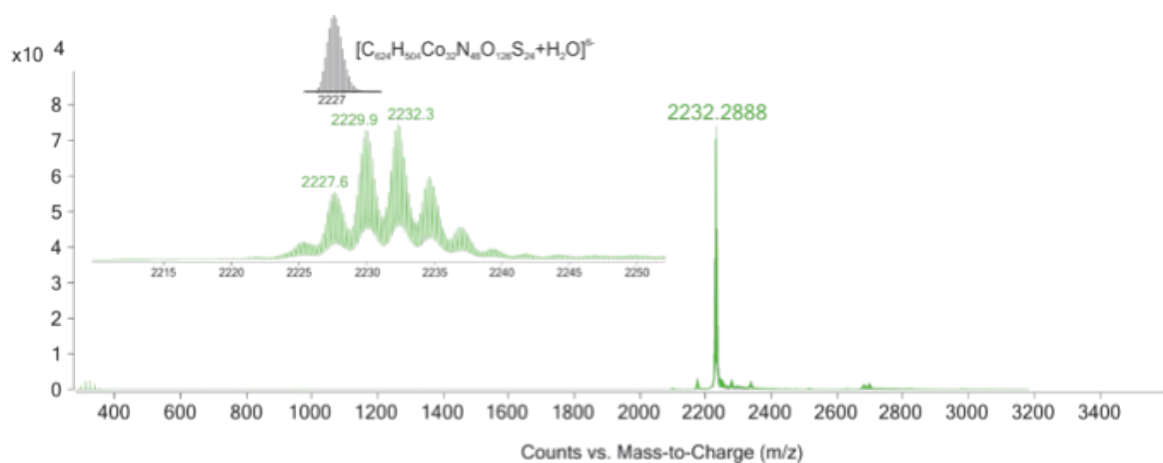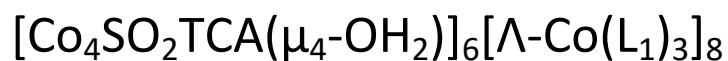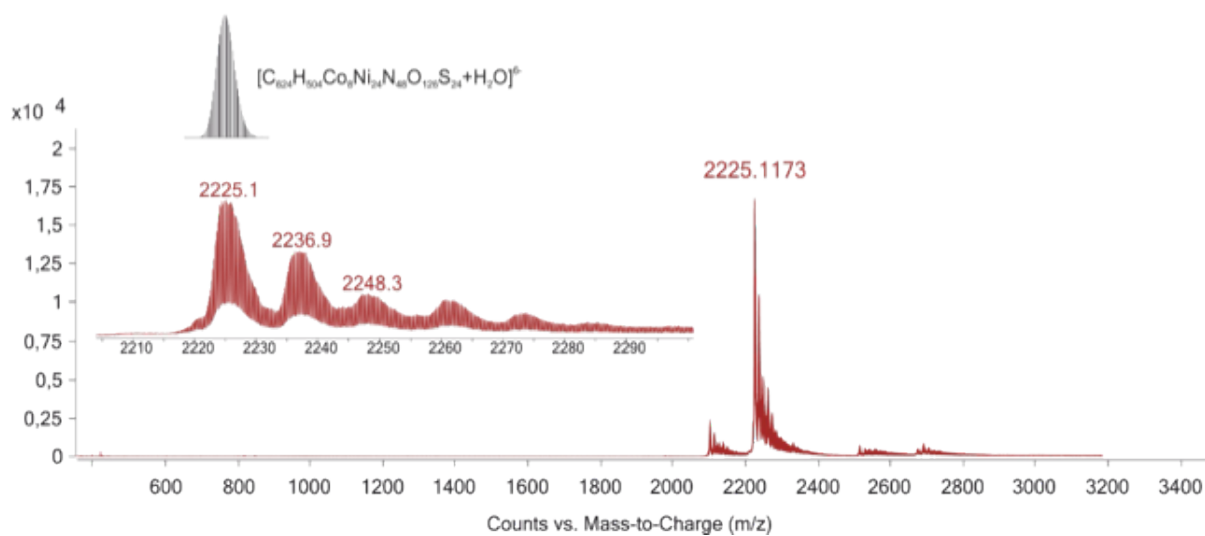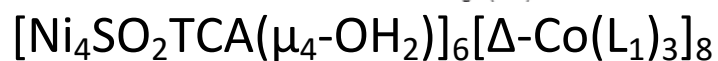

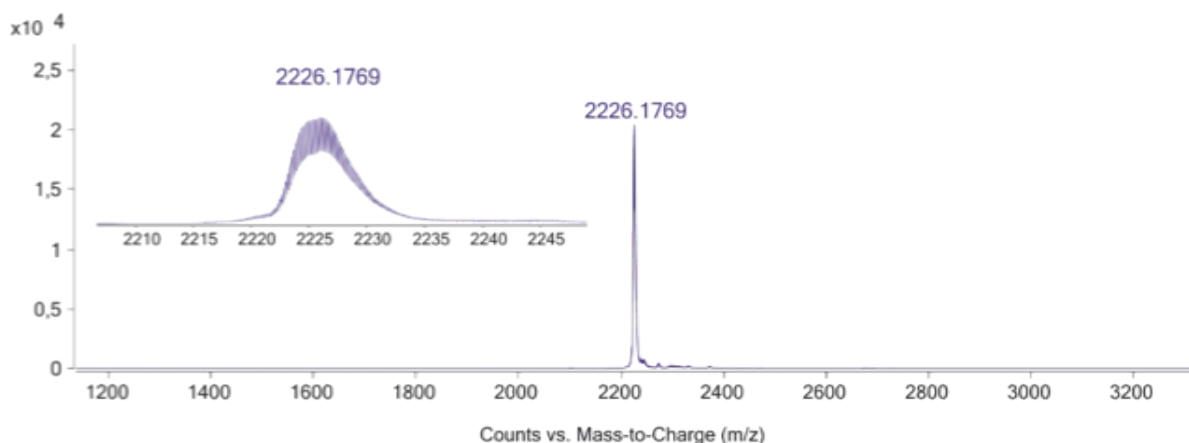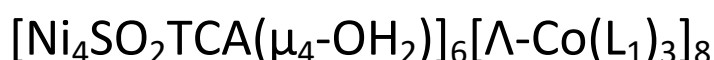

**Figure S4** ESI-MS data for  $[\text{M}_4\text{SO}_2\text{TCA}(\mu_4\text{-OH}_2)]_6[\Lambda/\Delta\text{-Co}(\text{L}_1)_3]_8$  (M = Ni or Co). Insets on left show zoomed view for base peak and peaks originating from different adducts. Comparison to theoretical isotopic pattern is given to  $\text{H}_2\text{O}$  adduct (ion at  $m/z$  2227) with black line.

### IM-MS calculations

The theoretical values of  ${}^T\text{CCS}_{\text{N}_2}$  can be calculated from the linear size of the obtained MOCs and the linear size of the buffer gas molecules ( $\text{N}_2$ ). From the crystallographic data, it was possible to estimate the size of the cage, as a distance between two most remote methyl groups of the opposite shuttlecock moieties (diameter(cage) approximately  $45.6\text{\AA}$ ), and Van der Waals radius of  $\text{N}_2$  is approximately  $1.55\text{\AA}$ , which results in the following equation:

$${}^T\text{CCS}_{\text{N}_2} = \pi * (r(\text{cage}) + r(\text{N}_2))^2$$

$${}^T\text{CCS}_{\text{N}_2} = \pi * (22.8 + 1.55)^2 = \underline{1862.72 \text{\AA}^2}$$

|                                                                                              | ${}^D\text{CCS}_{\text{N}_2}$ |
|----------------------------------------------------------------------------------------------|-------------------------------|
| $[\text{Co}_4\text{SO}_2\text{TCA}(\mu_4\text{-OH}_2)]_6[\Lambda\text{-Co}(\text{L}_1)_3]_8$ | 1830.0                        |
| $[\text{Co}_4\text{SO}_2\text{TCA}(\mu_4\text{-OH}_2)]_6[\Delta\text{-Co}(\text{L}_1)_3]_8$  | 1833.6                        |
| $[\text{Ni}_4\text{SO}_2\text{TCA}(\mu_4\text{-OH}_2)]_6[\Lambda\text{-Co}(\text{L}_1)_3]_8$ | Not resolved                  |
| $[\text{Ni}_4\text{SO}_2\text{TCA}(\mu_4\text{-OH}_2)]_6[\Delta\text{-Co}(\text{L}_1)_3]_8$  | 1846.1                        |

**Table S1:** experimental  ${}^D\text{CCS}_{\text{N}_2}$  for each MOC

CD spectra for  $[\text{Co}_4\text{SO}_2\text{TCA}(\mu_4\text{-OH}_2)]_6[\Lambda/\Delta\text{-Co(L)}_3]_8$

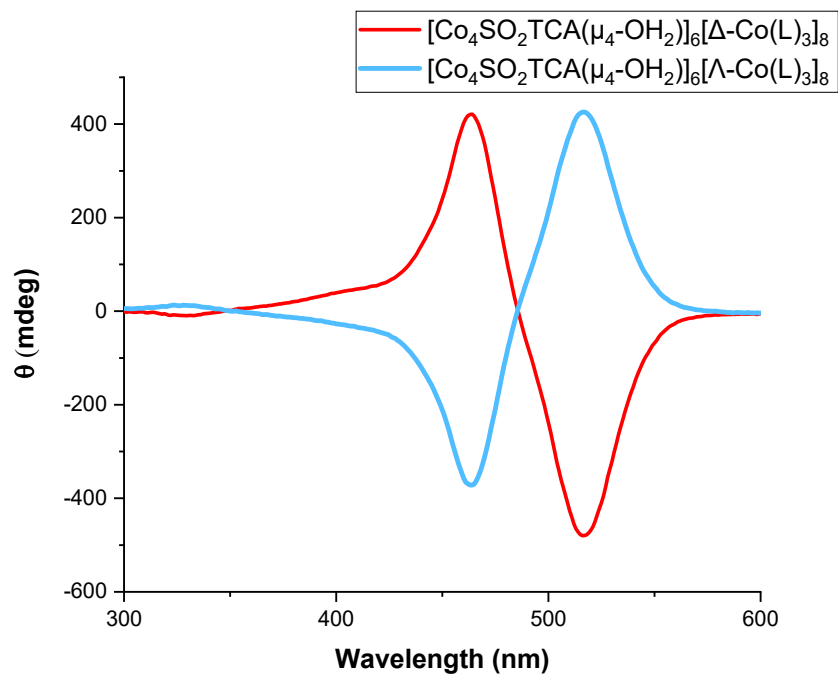

Figure S5: CD spectra for  $[\text{Co}_4\text{SO}_2\text{TCA}(\mu_4\text{-OH}_2)]_6[\Lambda/\Delta\text{-Co(L)}_3]_8$  (RT,  $5 \times 10^{-5}\text{M}$ , THF, 2 mm)

Chiral HPLC for  $[M_4SO_2TCA(\mu_4-OH_2)]_6[\Lambda/\Delta-Co(L)_3]_8$  (M = Ni or Co)

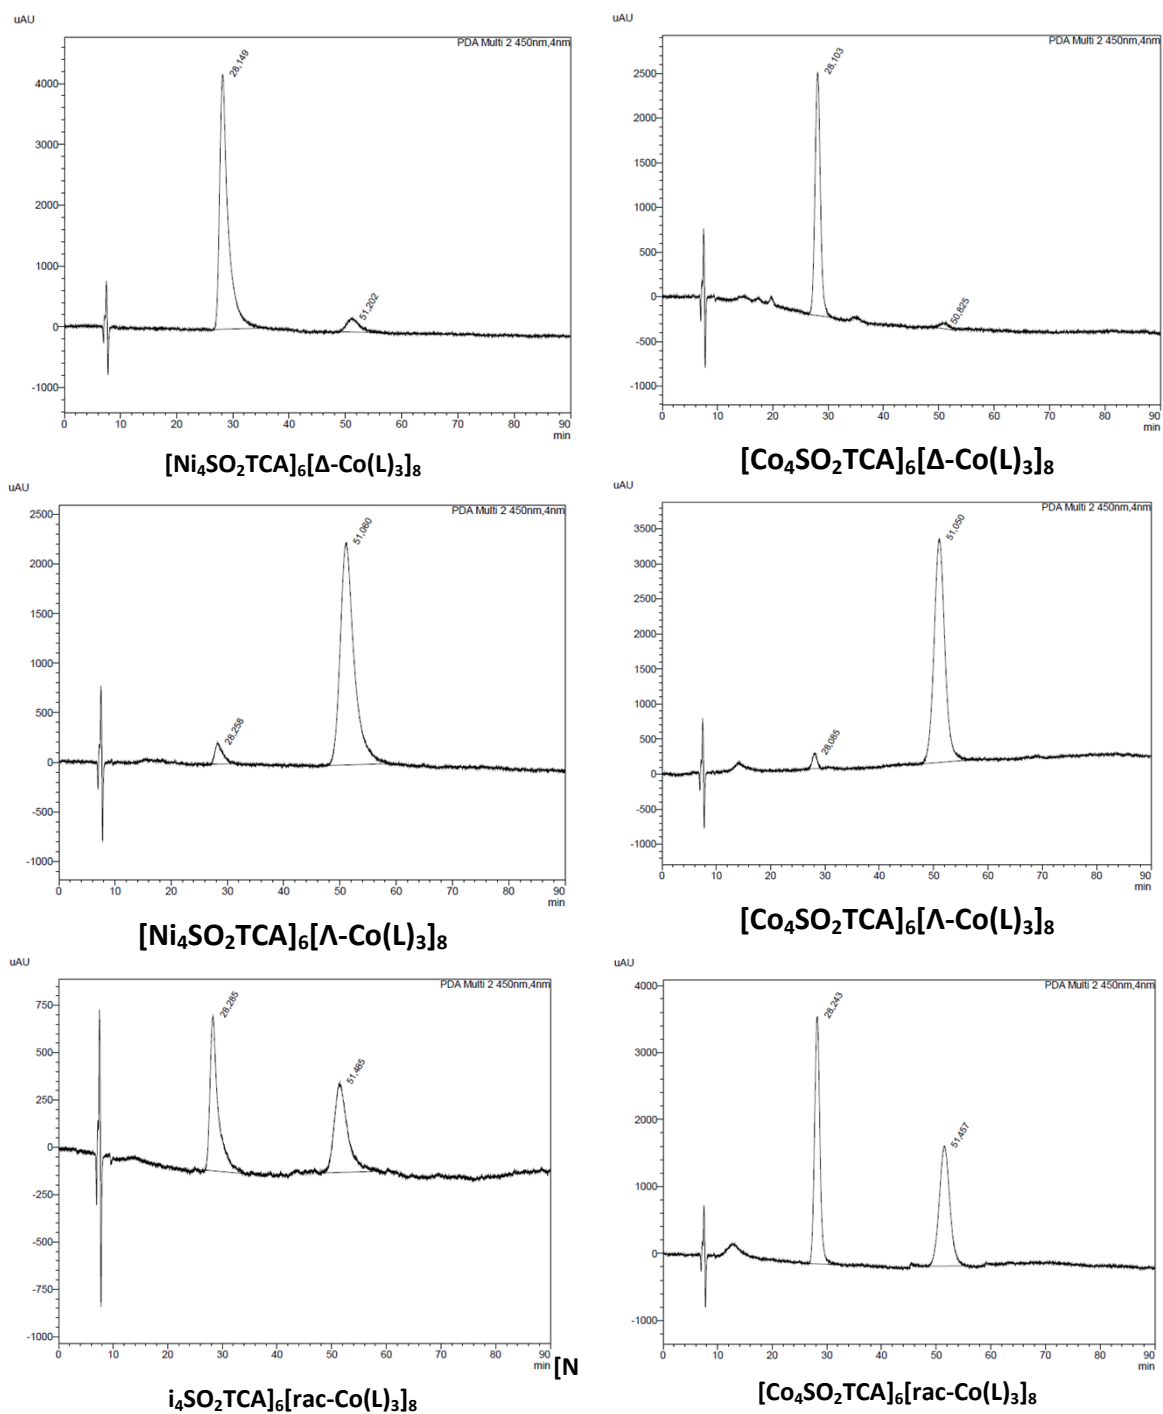

Figures S6: For comparison, HPLC chromatograms of  $[M_4SO_2TCA(\mu_4-OH_2)]_6[\Lambda/\Delta-Co(L)_3]_8$  (M = Ni or Co) together with their racemic mixtures



## Sorption properties of octahedral $M_{32}$ cages

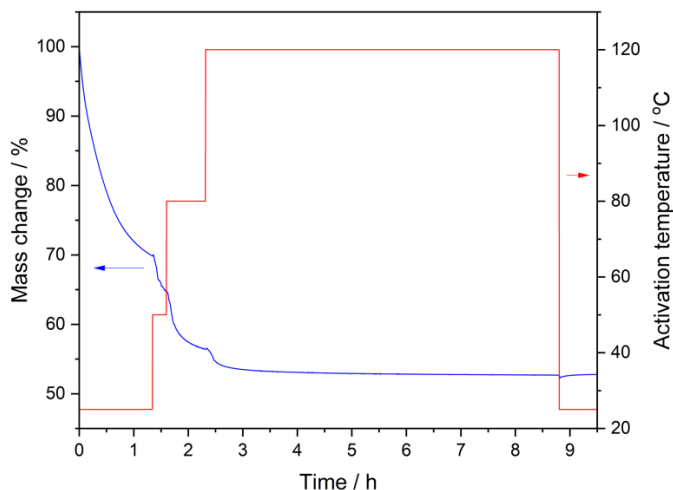

**Figure S7:** Temperature increase and mass loss upon stepwise activation of freshly filtered off  $[\text{Co}_4\text{SO}_2\text{TCA}(\mu_4\text{-OH}_2)_6][\Delta\text{-Co}(\text{L})_3]_8$  sample.

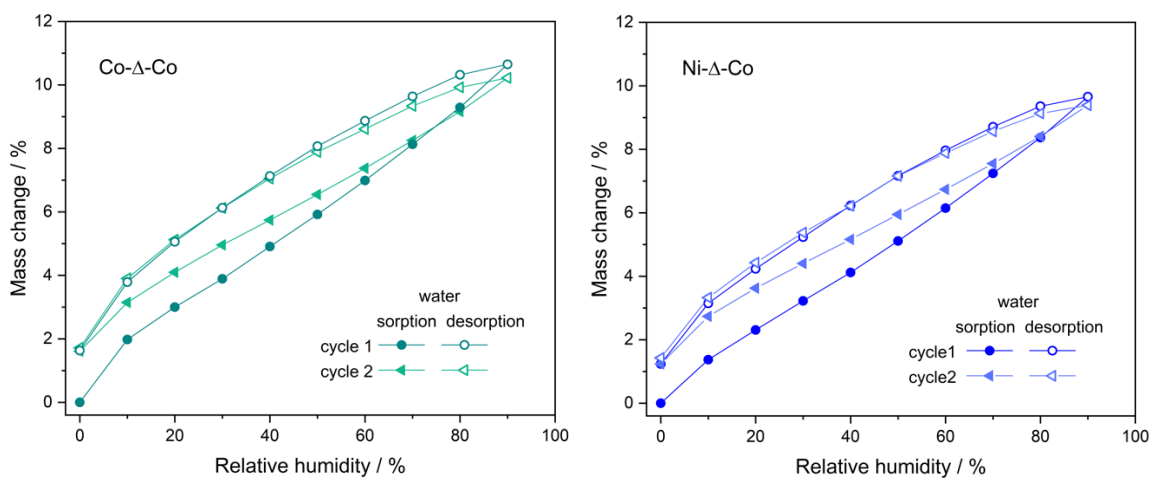

**Figure S8:** Isotherms of subsequent cycles of water sorption for  $[\text{M}_4\text{SO}_2\text{TCA}(\mu_4\text{-OH}_2)_6][\Delta\text{-Co}(\text{L})_3]_8$  ( $M = \text{Ni}$  or  $\text{Co}$ ) showing retention of adsorbed of water, which can be removed in the re-activation process at  $120^\circ\text{C}$ .

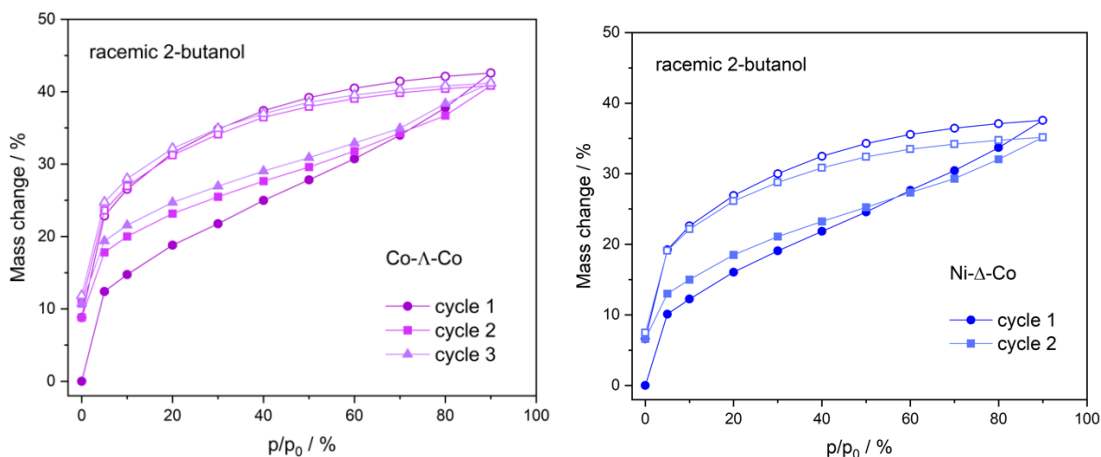

**Figure S9:** Isotherms of subsequent cycles of racemic 2-butanol sorption for  $[\text{M}_4\text{SO}_2\text{TCA}(\mu_4\text{-OH}_2)]_6[\Delta/\Lambda\text{-Co}(\text{L})_3]_8$  (M = Ni or Co) showing retention of adsorbed of 2-butanol, which can be removed in the re-activation process at 120°C.

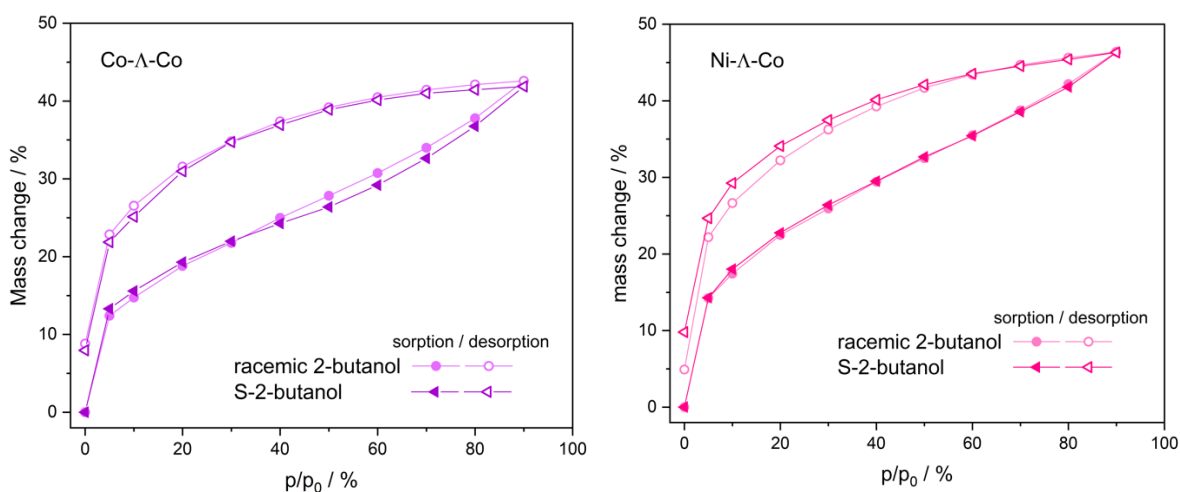

**Figure S10:** Comparison of sorption of racemic 2-butanol and enantiopure S-2-butanol for  $[\text{M}_4\text{SO}_2\text{TCA}(\mu_4\text{-OH}_2)]_6[\Lambda\text{-Co}(\text{L})_3]_8$ .
